# Supplementary material for: Fire Flocks: Participating Farmers’ Perceptions after Five Years of Development
Source: MDPI journal article supplement (doi:10.3390/land11101718), 2022-10-04
Supplement: s1 [file s1]

Archive with 1 entries (1 files):
- land-1859807-SM Annex S1.pdf
